1 **Antibiotic self-medication in Otuke district, northern Uganda: Prevalence and**  
2 **associated factors.**

3

4 Denis Diko Adoko <sup>1¶</sup> and Rebecca Nakaziba <sup>2¶\*</sup>

5

6 <sup>1</sup>Department of Midwifery, Lira University, Lira, Uganda

7 <sup>2</sup>Department of Pharmacology, Lira University, Lira, Uganda

8 *\*Corresponding author:* [rnakaziba@lirauni.ac.ug](mailto:rnakaziba@lirauni.ac.ug)/[d2rebecca1@gmail.com](mailto:d2rebecca1@gmail.com) [RN]

9

10

**NOTE: This preprint reports new research that has not been certified by peer review and should not be used to guide clinical practice.**

## 11 **Abstract**

12 Antibiotic self-medication is a form of irrational drug use that contributes to antimicrobial  
13 resistance, which results in increasing health care costs and morbidity and mortality rates in  
14 the population. The misuse of antimicrobial agents is highly linked with the growing problem  
15 of antimicrobial resistance within the population globally. Unless addressed, antibiotic self-  
16 medication will drive the world back to the pre-antibiotic era, with people dying helplessly due  
17 to infectious diseases. This study aimed to investigate the prevalence of antibiotic self-  
18 medication and its associated factors in the Otuke District, Northern Uganda. A community-  
19 based cross-sectional study was conducted in the Otuke Town Council, Otuke district. The data  
20 of adults aged 18 years and above were collected using a semi-structured questionnaire, and  
21 the data were coded and entered into SPSS software version 26. The data were descriptively  
22 analyzed for frequencies and percentages. Bivariant and multivariant analyses were performed  
23 to determine associations between the variables. Out of 385 participants, 68% self-medicated  
24 with antibiotics in the past 12 months. Freedom from drug use (AOR: 3.071; 95% CI: 1.203,  
25 7.876) and unregulated use of antibiotics (AOR at 95% CI: 8.288 (2.815, 24.397)) were more  
26 likely to lead to ASM (p value <0.001). Other significant factors included knowledge of  
27 antibiotics, previous symptom experience, previous successful treatment, long waiting hours  
28 and poor staff attitudes (p value <0.05). The most common self-medicated antibiotics were  
29 amoxicillin, Ampiclox and metronidazole.

30 Antibiotic self-medication in the Otuke district is very high due to the availability of medicines  
31 and lack of functional drug use regulatory frameworks. The district and government of Uganda  
32 should design and implement measures to mitigate this widespread antimicrobial misuse to  
33 prevent the development of antimicrobial resistance.

34 **Keywords:** Antibiotic; Self-medication; Prevalence; Factors; Otuke district; Uganda.

## 35 **Introduction**

36 The World Health Organization (WHO) defines self-medication as “the selection and use of  
37 medicines by individuals to treat self-recognized illnesses or symptoms without prescription  
38 and medical supervision” (1). It is a common form of healthcare practiced in most parts of the  
39 world, with over 50% of antibiotics bought and used over the counter (2). Antimicrobial self-  
40 medication (ASM) leads to the irrational use of drugs, contributing to antimicrobial resistance,  
41 which results in increasing health care costs coupled with increased mortality and morbidity  
42 (3, 4). In Africa, the prevalence of ASM ranges from 12.1% to 93.9%, with a mean prevalence  
43 of 55.7%. West Africa, as a sub-region, has the highest prevalence at 70.1%, followed by North  
44 Africa at 48.1% (5). In Uganda, the prevalence of ASM is as high as 75.7% (Ocan et al., 2014).  
45 The misuse of antimicrobial agents is highly linked to the growing problem of antimicrobial  
46 resistance (AMR) within the population (6). According to estimates by the World Health  
47 Organization (WHO), AMR could lead to 700,000 deaths annually at a global scale, and it has  
48 been estimated that 10 million people could die from drug-resistant bacterial infections  
49 worldwide by 2050 if the current trend of increasing AMR is not suppressed (7). Antibiotic  
50 resistance is a threat to the achievements of modern medicine. Without effective antibiotics to  
51 prevent and treat infections, organ transplants, chemotherapy, and surgeries such as cesarean  
52 sections are becoming much more dangerous. (8). In developed countries such as Germany,  
53 antibiotics are prescription only drugs (9). Unfortunately in developing countries, medicines  
54 use, including antibiotics, is rarely regulated (10). In developing countries, antibiotics can be  
55 readily purchased without any control, leading to more cases of antibiotic resistance (ABR)  
56 (11). The prevalence of ASM in developed countries ranges from 3% to 19%, while that in  
57 developing countries ranges from 24% to 73.9% (12). In Africa alone, the prevalence of ASM  
58 ranges from 12.1% to 93.9%, with a mean prevalence of 55.7% (5). For instance, in a studies  
59 conducted in Eritrea, Ghana, and Sudan; the prevalence of ASM was 45.1%, 36%, 71.3%

60 respectively (13-15). The main determinants of ASM include education level, age, gender, past  
61 successful use, severity of illness and income (16). According to Green, Keenan (17) whereas  
62 in low- and middle-income countries, past good experiences and suggestions from friends or  
63 relatives promote self-medication (18). In Eritrea, the main reasons for ASM were also  
64 previous successful experience and the illness being ‘not serious enough to seek medical care’  
65 (13) but in Afghanistan, economic problems, lack of time to visit doctors, and ease of use were  
66 cited as the main reasons for practicing ASM (19). In Pakistan, ASM is affected by male  
67 gender, age, and education level (20). In a related study performed in Moshi, Kilimanjaro,  
68 among university students, shortage of drugs at health facilities, long waiting times at health  
69 facilities and long distances to health facilities were the main causes of ASM (12). In a similar  
70 study, inability to pay for health care charges, the freedom to choose the preferred drugs, lack  
71 of medical professionals, poor quality of healthcare facilities, unregulated distribution of  
72 medicines and patients' misconception about physicians were factors for ASM in developing  
73 countries (21). According to a study performed in Afghanistan the commonly self-medicated  
74 antibiotics were penicillins, metronidazole, and ceftriaxone (19) while in Pakistan,  
75 Ciprofloxacin was the most commonly used self-medicated (20). In Western Uganda,  
76 Amoxicillin and metronidazole are the most commonly used antibiotics among nursing  
77 students (22) whereas in northern Uganda, cotrimoxazole, amoxicillin and metronidazole are  
78 the most commonly used (23).

79 Self-medication with antibiotics results in health problems such as treatment failure, an  
80 increased incidence of side effects and the development of acquired AMR, which decreases the  
81 effectiveness of antibiotics for treating bacterial infections and is now becoming a global health  
82 problem (10). The development of antibiotics was one of the great discoveries of modern  
83 medicine (24). Antibiotics fight bacteria and can cure life-threatening infectious diseases such  
84 as pneumonia, for which there was previously no effective treatment (21). However, the

85 improper use of antibiotics has led to an increasing number of bacteria becoming resistant to  
86 these types of drugs (25). Antimicrobial resistance (AMR) is currently increasing. It has been  
87 a global public health concern for the past decade (26). The number of antibiotic-resistant  
88 microorganisms is on the rise (27), making it difficult to achieve good treatment outcomes  
89 during the management of infectious diseases. The costs of AMR to economies and their  
90 healthcare systems are significant, affecting the productivity of patients and their caregivers  
91 through prolonged hospital stays and the need for more expensive and intensive care (28).  
92 Although AMR is a natural phenomenon, resistance develops more rapidly through the misuse  
93 and overuse of antimicrobial agents (28, 29). Therefore, the public plays a crucial role in the  
94 development or prevention of this disease. The current study aimed to determine the prevalence  
95 of antibiotic self-medication in Otuke District, Northern Uganda, and the associated factors to  
96 inform the government of the vice so that informed interventions can be designed.

## 97 **Materials and methods**

### 98 **Study Area**

99 The study was performed in the Otuke District. Otuke District is located within the Lango  
100 subregion in Northern Uganda. Otuke district consists of many government health facilities  
101 that are well distributed across all sub-counties and a total of 50 drug shops. The Otuke Town  
102 Council alone has five medical clinics (*Source: Records from the National Drug Authority,*  
103 *Otuke District*).

### 104 **Participant recruitment and procedures**

105 The study was a descriptive cross-sectional study employing quantitative methods of data  
106 collection. A cross-sectional design is time-saving and inexpensive. The sample size was  
107 calculated using the Kish Leslie (1965) formula assuming a proportion of 50% and yielded a

108 sample size of 385. The study was conducted among adult community members (aged 18 years  
109 and above) of the Otuke District excluding those who were very sick and could not respond to  
110 the questions. The study employed a cluster sampling technique. The clusters were randomly  
111 selected from the Adwon-Ibuto, Barodugu, Teogini and Te-Boke cells of the Otuke Town  
112 Council. The study participants were conveniently selected from each cluster and the potential  
113 participants were accessed by the research team moving into their homes. The study purpose,  
114 risks and benefits were clearly explained to potential participants who were required to sign an  
115 informed consent form to affirm their acceptance. Those who agreed to participate in the study  
116 and signed the consent form were recruited. The data were collected using a pretested  
117 questionnaire developed in line with the study objectives. The tool had three parts: Part A  
118 (Sociodemographic characteristics such as age, sex, and level of education), Part B (Self-  
119 medication practices), and Part C (Factors associated with ASM (Health system factors,  
120 individual factors, and interpersonal factors). Following the acquisition of informed consent,  
121 data were collected using an interviewer-administered questionnaire. Each section of the  
122 questionnaire was well explained to the respondents who then provided answers. The  
123 questionnaires were checked for completeness after data collection, and those with incomplete  
124 or irrelevant data were excluded from the analysis. Following data collection, the data were  
125 coded and double-entered into Statistical Package for Social Sciences (SPSS) software version  
126 26 and descriptively analyzed for frequencies and percentages. Bivariate and multivariate  
127 analyses were performed to identify associations between the variables.

## 128 **Ethical issues**

129 The study was presented before the faculty of Nursing and Midwifery, Lira University and to  
130 Otuke district administration for approval. Moreover, the study purpose, risks and benefits were  
131 clearly explained to potential participants (adults aged 18 years and above) who were required  
132 to sign an informed consent form to affirm their acceptance before recruitment into the study.

133 **Results**

134 **Socio-demographic data**

135 A total of 49.4% of the participants were aged between 18 and 28 years, 56.6% were females,  
 136 54.3% stopped at the primary level of education, 53.5% were married, 65.5% were self-  
 137 employed, 94.8% were members of the Lango tribe, and 44.9% were Anglicans (Table 1).

138 **Table 1: Socio-demographic characteristics of the study participants (n=385)**

| Variable                       | Frequency(f) | Percentage (%) |
|--------------------------------|--------------|----------------|
| <b>Age</b>                     |              |                |
| 18-28                          | 190          | 49.4           |
| 29-40                          | 114          | 29.6           |
| 41-60                          | 64           | 16.6           |
| 61 and above                   | 17           | 4.4            |
| <b>Gender</b>                  |              |                |
| Male                           | 167          | 43.4           |
| Female                         | 218          | 56.6           |
| <b>Level of education</b>      |              |                |
| Primary                        | 209          | 54.3           |
| Secondary                      | 121          | 31.4           |
| Tertiary                       | 47           | 12.2           |
| No education                   | 8            | 2.1            |
| <b>Marital status</b>          |              |                |
| Single                         | 153          | 39.7           |
| Married                        | 206          | 53.5           |
| Separated                      | 26           | 6.8            |
| <b>Occupation</b>              |              |                |
| Self-employed                  | 252          | 65.5           |
| Government employee            | 40           | 10.4           |
| Employed in the private sector | 30           | 7.8            |
| Not employed                   | 63           | 16.4           |
| <b>Tribe</b>                   |              |                |
| Lango                          | 365          | 94.8           |
| Others                         | 20           | 5.2            |
| <b>Religion</b>                |              |                |
| Anglican                       | 173          | 44.9           |
| Seventh-Day Adventist          | 16           | 4.2            |
| Islam                          | 8            | 2.1            |
| Catholic                       | 155          | 40.3           |
| Pentecostal                    | 31           | 8.1            |
| Others                         | 2            | 0.5            |

139

## 140 Prevalence of antibiotic self-medication

141 The majority of the community members of the Otuke Town Council (68%) practiced self-  
142 medication (Fig 1)

143 **Fig. 1: Prevalence of antibiotic self-medication in Otuke district (n=385).**

## 144 Commonly self-medicated antibiotics and their sources

145 The most common self-medicated antibiotic was amoxicillin (51.3%). Most of the respondents  
146 (98.5%) obtained antibiotics from drug shops/pharmacy (Table 2).

147 **Table 2: Commonly self-medicated antibiotics and their sources (n=385)**

| Variable                                          | Frequency(f) | Percentage (%) |
|---------------------------------------------------|--------------|----------------|
| <i>Self-medicated antibiotics</i>                 |              |                |
| Amoxicillin                                       | 134          | 51.3           |
| Ampiclox                                          | 87           | 33.3           |
| Cloxacillin                                       | 24           | 9.2            |
| Metronidazole                                     | 57           | 21.9           |
| Erythromycin                                      | 28           | 10.8           |
| Azithromycin                                      | 13           | 5.0            |
| Cotrimoxazole                                     | 21           | 8.1            |
| Ciprofloxacin                                     | 42           | 16.1           |
| Doxycycline                                       | 24           | 9.2            |
| Other antibiotics                                 | 35           | 13.5           |
| <i>Sources of antibiotics for self-medication</i> |              |                |
| Drug shop/pharmacy                                | 257          | 98.5           |
| Friends/relatives                                 | 3            | 1.1            |
| Previous remainder                                | 1            | 0.4            |
| Others                                            | 00           | 0.0            |

## 148 Factors associated with Antibiotic self-medication

### 149 Health system, individual and interpersonal factors

150 Among the health system factors, individual factors and interpersonal factors; long waiting  
151 hours (82.9%), previous successful treatment (55.6%), and suggestions by friends/relatives  
152 (24.4%) had the greatest effects respectively (Table 3).

153

154



155 **Table 3: Health system, individual and interpersonal factors associated with ASM**

| Variable                                | Frequency(f) | Percentage (%) |
|-----------------------------------------|--------------|----------------|
| <b>Health system factors</b>            |              |                |
| Poor staff attitude                     | 110          | 28.6           |
| Health facility too far                 | 55           | 14.3           |
| Long waiting hours                      | 319          | 82.9           |
| No drugs at the health facility         | 268          | 69.9           |
| Lack of medical professional            | 35           | 9.1            |
| Unregulated distribution of antibiotics | 89           | 23.1           |
| <b>Individual factors</b>               |              |                |
| Previous symptom experience             | 207          | 53.8           |
| Previous successful treatment           | 214          | 55.6           |
| Illness was not serious,                | 211          | 54.8           |
| Storage of antibiotics                  | 109          | 28.3           |
| Lack of time to visit doctors           | 70           | 18.2           |
| Misconception about health workers      | 21           | 5.5            |
| Inability to pay for the health charges | 48           | 12.5           |
| Freedom to choose the drugs             | 177          | 46.1           |
| Knowledge on the antibiotics            | 157          | 40.8           |
| Old prescription                        | 113          | 29.4           |
| <b>Interpersonal factors</b>            |              |                |
| Given by a friend                       | 43           | 11.2           |
| Suggestion by a relative/friend         | 94           | 24.4           |
| Drug brought by health worker           | 41           | 10.6           |

156

157 **Associations between socio-demographic characteristics with ASM**

158 There was no significant association between socio-demographic characteristics and antibiotic  
 159 self-medication in the present study (Table 4).

160 **Table 4: Association of sociodemographic characteristics with ASM (at 95% CI)**

| Variables     | Antibiotic Self-medication: Freq (%) |          | X <sup>2</sup> | df | p value |
|---------------|--------------------------------------|----------|----------------|----|---------|
|               | Yes                                  | No       |                |    |         |
| <b>Age</b>    |                                      |          |                |    |         |
| 18-28         | 127(48.7)                            | 63(50.8) |                |    |         |
| 29-40         | 80(30.7)                             | 34(27.4) | 1.369          | 3  | 0.694   |
| 41-60         | 41(15.7)                             | 23(18.5) |                |    |         |
| 61 and above  | 13(5.0)                              | 4(3.2)   |                |    |         |
| <b>Gender</b> |                                      |          |                |    |         |
| Male          | 114(43.7)                            | 53(42.7) | 0.030          | 1  | 0.862   |
| Female        | 147(56.6)                            | 71(57.3) |                |    |         |

| <b>Level of education</b>      |           |           |       |   |       |
|--------------------------------|-----------|-----------|-------|---|-------|
| Primary                        | 137(52.5) | 72(58.1)  |       |   |       |
| Secondary                      | 78(29.9)  | 43(34.7)  | 7.483 | 3 | 0.862 |
| Tertiary                       | 39(14.9)  | 8(6.5)    |       |   |       |
| No education                   | 7(2.7)    | 1(0.8)    |       |   |       |
| <b>Marital status</b>          |           |           |       |   |       |
| Single                         | 107(40.2) | 48(38.7)  |       |   |       |
| Married                        | 140(53.6) | 66(53.2)  | 0.517 | 2 | 0.772 |
| Separated                      | 16(6.1)   | 10(8.1)   |       |   |       |
| <b>Occupation</b>              |           |           |       |   |       |
| Self-employed                  | 164(62.8) | 88(71.0)  |       |   |       |
| Government employee            | 30(11.5)  | 10(8.1)   | 2.655 | 3 | 0.448 |
| Employed in the private sector | 21(8.0)   | 9(7.3)    |       |   |       |
| Not employed                   | 46(17.6)  | 17(13.7)  |       |   |       |
| <b>Tribe</b>                   |           |           |       |   |       |
| Lango                          | 246(94.3) | 119(96.0) | 0.502 | 1 | 0.479 |
| Others                         | 15(5.7)   | 5(4.0)    |       |   |       |
| <b>Religion</b>                |           |           |       |   |       |
| Anglican                       | 121(69.9) | 52(30.1)  |       |   |       |
| Seventh-Day Adventist          | 12(75.0)  | 4(25.0)   |       |   |       |
| Islam                          | 6(75.0)   | 2(25.0)   | 3.511 | 5 | 0.622 |
| Catholic                       | 102(65.8) | 53(34.2)  |       |   |       |
| Pentecostal                    | 18(58.1)  | 13(41.9)  |       |   |       |
| Others                         | 2(0.5)    | 0(100)    |       |   |       |

161

## 162 **Associations between health system factors with ASM**

163 Most health system factors were strongly associated with antibiotic self-medication (p value  
 164 <0.001) (Table 5).

165 **Table 5: Association of health system factors with ASM**

| <b>Variables</b>               | <b>Antibiotic Self-medication: Freq (%)</b> |           | <b>df</b> | <b>COR at 95% CI</b> | <b>p value</b> |
|--------------------------------|---------------------------------------------|-----------|-----------|----------------------|----------------|
|                                | <b>Yes</b>                                  | <b>No</b> |           |                      |                |
| <b>Poor staff attitude</b>     |                                             |           | 1         | 12.750(6.208,26.184) | <0.001         |
| No                             | 159(57.8)                                   | 116(42.2) |           |                      |                |
| Yes                            | 102(92.7)                                   | 8(7.3)    |           |                      |                |
| <b>Health facility too far</b> |                                             |           | 1         | 1.661(1.330,2.076)   | <0.001*        |
| No                             | 206(62.4)                                   | 124(37.6) |           |                      |                |
| Yes                            | 55(100)                                     | 0(0.0)    |           |                      |                |
| <b>Long waiting hours</b>      |                                             |           | 1         | 15.500(5.639,42.604) | <0.001*        |

|                                                |           |           |   |                    |         |
|------------------------------------------------|-----------|-----------|---|--------------------|---------|
| No                                             | 62(93.9)  | 4(6.1)    |   |                    |         |
| Yes                                            | 199(62.4) | 120(37.6) |   |                    |         |
| <b>No drugs at the health facility</b>         |           |           | 1 | 2.079(1.412,3.061) | <0.001* |
| No                                             | 79(67.5)  | 38(32.5)  |   |                    |         |
| Yes                                            | 182(67.9) | 86(32.1)  |   |                    |         |
| <b>Lack of medical professional</b>            |           |           | 1 |                    | 0.998   |
| No                                             | 226(64.6) | 124(35.4) |   |                    |         |
| Yes                                            | 35(100)   | 0(0.0)    |   |                    |         |
| <b>Unregulated distribution of antibiotics</b> |           |           | 1 | 3.852(2.907,5.106) | <0.001* |
| No                                             | 235(79.4) | 61(20.6)  |   |                    |         |
| Yes                                            | 28(29.2)  | 63(70.8)  |   |                    |         |

166

## 167 **Associations between interpersonal factors with ASM**

168 There was a very strong association between most interpersonal factors and self-medication (p  
169 value<0.05) (Table 6).

170 **Table 6: Association between interpersonal factors with ASM**

| Variables                              | Antibiotic Self-medication: Freq (%) |           | df | COR at 95% CI          | p value |
|----------------------------------------|--------------------------------------|-----------|----|------------------------|---------|
|                                        | No                                   | Yes       |    |                        |         |
| <b>Given by a friend</b>               |                                      |           | 1  | 1.758(1.410,2.192)     | <0.001* |
| No                                     | 124(36.3)                            | 218(63.7) |    |                        |         |
| Yes                                    | 0(0.0)                               | 43(100)   |    |                        |         |
| <b>Suggestion by a relative/friend</b> |                                      |           | 1  | 93.000(12.963,667.189) | <0.001* |
| No                                     | 123(42.3)                            | 168(57.7) |    |                        |         |
| Yes                                    | 1(1.1)                               | 93(98.9)  |    |                        |         |
| <b>Drug brought by health worker</b>   |                                      |           | 1  | 0.640(0.591,0.692)     | 0.997   |
| No                                     | 124(36.0)                            | 220(64.0) |    |                        |         |
| Yes                                    | 0(0.0)                               | 41(100)   |    |                        |         |

171

## 172 **Associations of individual factors with ASM**

173 As indicated in Table 7 below, there was a strong association between most of the individual  
174 factors and ASM (p value <0.001).

175

176 **Table 7: Association of individual factors with ASM**

| Variables                               | Antibiotic Self-medication: Freq (%) |           | df | COR at 95% CI      | p value |
|-----------------------------------------|--------------------------------------|-----------|----|--------------------|---------|
|                                         | No                                   | Yes       |    |                    |         |
| Previous symptom experience             |                                      |           | 1  | 3.684(2.574,5.273) | <0.001* |
| No                                      | 38(21.3)                             | 140(78.7) |    |                    |         |
| Yes                                     | 86(41.5)                             | 121(58.5) |    |                    |         |
| Previous successful treatment           |                                      |           | 1  | 0.462(0.334,0.637) | <0.001* |
| No                                      | 117(68.4)                            | 54(31.6)  |    |                    |         |
| Yes                                     | 7(3.3)                               | 207(96.7) |    |                    |         |
| Illness was not serious                 |                                      |           | 1  | 0.813(0.603,1.095) | 0.173   |
| No                                      | 96(55.5)                             | 78(44.8)  |    |                    |         |
| Yes                                     | 28(13.3)                             | 183(86.7) |    |                    |         |
| Storage of antibiotics                  |                                      |           | 1  | 1.226(0.967,1.554) | 0.092   |
| No                                      | 124(44.9)                            | 152(55.1) |    |                    |         |
| Yes                                     | 0(0.00)                              | 109(100)  |    |                    |         |
| Lack of time to visit doctors           |                                      |           | 1  | 1.540(1.229,1.931) | <0.001* |
| No                                      | 124(39.4)                            | 191(60.6) |    |                    |         |
| Yes                                     | 0(0.00)                              | 70(100)   |    |                    |         |
| Misconception about health workers      |                                      |           | 1  | 1.935(1.558,2.404) | <0.001* |
| No                                      | 124(34.1)                            | 240(65.9) |    |                    |         |
| Yes                                     | 0(0.0)                               | 21(100)   |    |                    |         |
| Inability to pay for the health charges |                                      |           | 1  |                    | 0.997   |
| No                                      | 124(36.8)                            | 213(63.2) |    |                    |         |
| Yes                                     | 0(0.0)                               | 48(100)   |    |                    |         |
| Freedom to choose the drugs             |                                      |           | 1  | 0.580(0.428,0.788) | <0.001* |
| No                                      | 12(5.8)                              | 195(94.2) |    |                    |         |
| Yes                                     | 112(63.3)                            | 65(36.7)  |    |                    |         |
| Knowledge on the antibiotics            |                                      |           | 1  | 5.162(3.630,7.340) | <0.001* |
| No                                      | 37(16.2)                             | 191(83.8) |    |                    |         |
| Yes                                     | 87(55.4)                             | 70(44.6)  |    |                    |         |
| Old prescription                        |                                      |           | 1  |                    | 0.996   |
| No                                      | 124(45.6)                            | 148(54.4) |    |                    |         |
| Yes                                     | 0(0.0)                               | 113(100)  |    |                    |         |

177

178 **Legend:** CI- confidence interval \* significant p value

## 179 **Multivariate analysis of the association of factors with ASM**

180 The results from multivariate analysis of variables showed that freedom to choose drugs (AOR:  
 181 3.071; 95% CI (1.203, 7.876)) and unregulated use of antibiotics (AOR at 95% CI: 8.288  
 182 (2.815, 24.397)) were more likely to lead to ASM (p value <0.001). Other significant factors

183 included knowledge of antibiotics, previous symptom experience, previous successful  
 184 treatment, long waiting hours and poor staff attitudes (p value <0.05) (Table 8).

185 **Table 8: Association between factors and antibiotic self-medication**

| Variable                                        | Bivariate p value | df | AOR at 95% CI                 | p value          |
|-------------------------------------------------|-------------------|----|-------------------------------|------------------|
| Knowledge on the antibiotics<br>No<br>Yes       | <0.001            | 1  | 1.00<br>3.079(1.203,7.876)    | 0.019*           |
| Freedom to choose the drugs<br>No<br>Yes        | <0.001            | 1  | 1.00<br>6.085(2.277,16.262)   | <0.001*<br>0.124 |
| Misconception about health workers<br>No<br>Yes | <0.001            | 1  | 1.00<br>2.810(0.456,17.319)   | 0.266            |
| Lack of time to visit doctors<br>No<br>Yes      | <0.001            | 1  | 1.00<br>0.312(0.072,1.343)    | 0.118            |
| Previous symptom experience<br>No<br>Yes        | <0.001            | 1  | 1.00<br>8.212(2.688,0.476)    | 0.008*           |
| Previous successful treatment<br>No<br>Yes      | <0.001            | 1  | 1.00<br>0.040(0.013,0.124)    | 0.002*           |
| Given by a friend<br>No<br>Yes                  | <0.001            | 1  | 1.00<br>1.785(0.476,6.688)    | 0.390            |
| Suggestion by a relative/friend<br>No<br>Yes    | <0.001            | 1  | 1.00<br>0.305(0.074,1.261)    | 0.101            |
| Unregulated use of antibiotics<br>No<br>Yes     | <0.001            | 1  | 1.00<br>8.288(2.815,24.397)   | 0.001*           |
| No drugs at the health facility<br>No<br>Yes    | <0.001            | 1  | 1.00<br>1.093(0.400,2.986)    | 0.862            |
| Long waiting hours<br>No<br>Yes                 | <0.001            | 1  | 1.00<br>21.616(3.776,123.759) | 0.006*           |
| Health facility too far<br>No<br>Yes            | <0.001            | 1  | 1.00<br>0.633(0.186,2.157)    | 0.465            |
| Poor staff attitude<br>No<br>Yes                | <0.001            | 1  | 1.00<br>0.052(0.004,0.622)    | 0.020            |

186 Legend: CI- confidence interval \* significant p value

## 187 **Discussion**

188 ASM is one of the most common causes of AMR worldwide; however, it can be controlled if  
189 appropriate measures are taken. The ability to develop preventive measures can only be made  
190 possible by tracking the self-medication behaviors of people in the public. Additionally, it  
191 reveals the health system's weaker areas. To ascertain the prevalence of ASM in the Otuke  
192 District and to gain insight into the contributing factors of ASM, the current cross-sectional  
193 study was carried out.

194 Of the 385 participants, 68% (over two-thirds) reported having self-medicated with antibiotics  
195 in the past 6 months. This implies that approximately 7 in 10 community members practiced  
196 ASM, with 49.4% of ASM being in the age bracket 18-28 years. This could be attributed to the  
197 fact that there are no regulations in place to curb the practice, so every member of the  
198 community is free to buy antibiotics from the many established drug shops or pharmacies. This  
199 could also be the result of the long waiting hours experienced when patients seek health care  
200 services in various health facilities. The findings of this study are closely related to those of a  
201 similar study in Sudan, where the prevalence of ASM was 71% (15); and to another in northern  
202 Uganda, which was 73% (23); and in Afghanistan, at 73.2% (19). Against this background, a  
203 way forward is worth seeking to reduce the practice of ASM among the community. On the  
204 other hand, a similar study conducted among nursing students in Western Uganda showed a  
205 much greater prevalence of ASM, at 85.7% (22). This could be due to the pharmacological  
206 knowledge gained by the nursing students. In contrast, related studies in the Middle East and  
207 South America revealed lower prevalence rates of ASM, at 36.1% to 45.8% and 29%,  
208 respectively (12). This could be due to better drug use regulations that guide antimicrobial use  
209 in these countries, whereby antibiotics are prescription only drugs.

210 A variety of factors were analyzed for their association with ASM in this study grouped into  
211 health system, individual and interpersonal factors. The findings indicated that freedom to  
212 choose drugs (AOR: 3.071; 95% CI (1.203, 7.876)) and unregulated use of antibiotics (AOR  
213 at 95% CI: 8.288 (2.815, 24.397)) were more likely to lead to ASM (p value <0.001). This is  
214 true because in Uganda, the use of antibiotics is not highly regulated, so members of the public  
215 have free access to these antibiotics. This finding is similar to that of Sachdev and others who  
216 found that unregulated deliveries were the major driver of ASM (30). Therefore, the enactment  
217 of drug regulation laws could be the beginning of an end to ASM. Previous symptom  
218 experience was also significantly associated with ASM probably because individuals tend to  
219 associate a given symptom with a disease. Therefore, a symptom managed successfully in the  
220 past is deemed manageable in the same way in the future. This is in agreement with findings  
221 of a research conducted in Pakistan (31). Although many symptoms may be successfully  
222 managed by a specific drug, different conditions can manifest in a similar way, leading to the  
223 irrational use of antibiotics. Communities should be aware that some diseases mimic each other  
224 and that the use of a given antibiotic could be more of a disaster than a blessing. In addition,  
225 previous successful treatment was highly significantly associated with ASM. This could have  
226 been due to the patient's ability to remember how he/she was managed. This finding is  
227 consistent with a study performed in low- and middle-income countries (LMICs) in which the  
228 habit of self-medication using previous treatments was identified (18). There is a need for more  
229 patient and family sensitization to the dangers of practicing ASM. Furthermore, long waiting  
230 hours in health facilities were reported by multiple respondents in the present study were  
231 associated with ASM. Many respondents thought it was a waste of time going to a health  
232 facility at 8:00 am and returning home late in the afternoon. Therefore, they end up leaving the  
233 facility in search of quicker services at drug stores. In Ethiopia, a similar study supported the  
234 present findings where long waiting times contributed to self-medication (32). Increased

235 staffing could reduce the time spent at the facility during health seeking and improve patient  
236 trust. Moreover, poor staff attitude was another factor that was significantly associated with  
237 ASM in this study. Staff attitudes in terms of being rude, asking for money or not willing to  
238 help caused the community members to go elsewhere and buy their own drugs without  
239 consultation. This finding was consistent with those from studies in Cameroon and LMICs (33,  
240 34). Regular staff motivation and appraisal could instill and sustain the drive to serve the  
241 medical staff, which could improve medication practices with antibiotics and prevent ASM.

242 Of the 385 participants, 98.5% bought antibiotics from drug shops/pharmacies. This study also  
243 explored the common self-medicated antibiotics and discovered Amoxicillin (51.3%),  
244 Ampiclox (33.3%), and Metronidazole(21.9%). In western Uganda among nursing students,  
245 Amoxicillin and Metronidazole were the most commonly used antibiotics (22) as well as in  
246 northern Uganda as reported by Ocan, Bwanga (23). In Sudan, Amoxicillin is the most  
247 commonly used antibiotic (15). The increased use of Amoxicillin could be due to its lower cost  
248 than other antibiotics and the high prevalence of respiratory tract infections (although not all  
249 respiratory infections require antibiotics for treatment) (35). Sensitizing the community to  
250 various treatment modalities for respiratory infections could be vital for minimizing ASM.

## 251 **Conclusion and recommendations**

252 Self-medication with antibiotics is highly practiced in the Otuke District. Factors leading to  
253 ASM originate from the health system as well as from individuals predisposing the community  
254 to the danger of antimicrobial resistance if not addressed.

255 The health team should provide adequate information regarding the dangers of ASM to the  
256 general public and equip community members with knowledge regarding supportive ways of  
257 managing common conditions. In addition, the government should enact drug laws that govern  
258 the use of antimicrobial agents and improve staff welfare to motivate them to effectively deliver



259 their services to the community. Furthermore, the government should recruit more staff to  
260 quicken health service delivery.

261 **Acknowledgments**

262 The community of the Otuke district for participating in this study.

263 **Author contributions**

264 ADD: Conception, methods, data collection; reporting and review; RN: Methods, supervision,  
265 manuscript draft and review

## 266 References

- 267 1. Namususwa S, Nakaziba R. Practice and knowledge of the dangers of self-medication among  
268 pregnant mothers attending antenatal care in Iganga District (Uganda). *Nurs Commun.*  
269 2022;6:e2022014.
- 270 2. Ocan M, Obuku EA, Bwanga F, Akena D, Richard S, Ogwal-Okeng J, et al. Household  
271 antimicrobial self-medication: a systematic review and meta-analysis of the burden, risk factors and  
272 outcomes in developing countries. *BMC public health.* 2015;15(1):742.
- 273 3. Haque M, Rahman NAA, McKimm J, Kibria GM, Azim Majumder MA, Haque SZ, et al. Self-  
274 medication of antibiotics: investigating practice among university students at the Malaysian National  
275 Defence University. *Infect Drug Resist.* 2019;12:1333-51.
- 276 4. Torres NF, Solomon VP, Middleton LE. Patterns of self-medication with antibiotics in Maputo  
277 City: a qualitative study. *Antimicrobial Resistance & Infection Control.* 2019;8:1-12.
- 278 5. Yeika EV, Ingelbeen B, Kemah BL, Wirsiy FS, Fomengia JN, van der Sande MAB. Comparative  
279 assessment of the prevalence, practices and factors associated with self-medication with antibiotics  
280 in Africa. *Tropical medicine & international health : TM & IH.* 2021;26(8):862-81.
- 281 6. Silva A, Costa E, Freitas A, Almeida A. Revisiting the frequency and antimicrobial resistance  
282 patterns of bacteria implicated in community urinary tract infections. *Antibiotics.* 2022;11(6):768.
- 283 7. Medina M-j, Legido-Quigley H, Hsu LY. Antimicrobial resistance in one health. *Global Health*  
284 *Security: Recognizing Vulnerabilities, Creating Opportunities.* 2020:209-29.
- 285 8. WHO. Antibiotic resistance. 2020.
- 286 9. Alrasheedy AA, Alsalloum MA, Almuqbil FA, Almuzaini MA, Aba Alkhayl BS, Albishri AS, et al.  
287 The impact of law enforcement on dispensing antibiotics without prescription: a multi-methods  
288 study from Saudi Arabia. *Expert review of anti-infective therapy.* 2020;18(1):87-97.
- 289 10. Nepal G, Bhatta S. Self-medication with antibiotics in WHO Southeast Asian Region: a  
290 systematic review. *Cureus.* 2018;10(4).
- 291 11. Ajibola O, Omisakin OA, Eze AA, Omoleke SA. Self-medication with antibiotics, attitude and  
292 knowledge of antibiotic resistance among community residents and undergraduate students in  
293 Northwest Nigeria. *Diseases.* 2018;6(2):32.
- 294 12. Chuwa BB, Njau LA, Msigwa KI, Shao E. Prevalence and factors associated with self  
295 medication with antibiotics among University students in Moshi Kilimanjaro Tanzania. *Afr Health Sci.*  
296 2021;21(2):633-9.
- 297 13. Ateshim Y, Bereket B, Major F, Emun Y, Woldai B, Pasha I, et al. Prevalence of self-  
298 medication with antibiotics and associated factors in the community of Asmara, Eritrea: a descriptive  
299 cross sectional survey. *BMC Public Health.* 2019;19(1):726.
- 300 14. Kretchy J-P, Adase SK, Gyansa-Lutterodt M. The prevalence and risks of antibiotic self-  
301 medication in residents of a rural community in Accra, Ghana. *Scientific African.* 2021;14:e01006.
- 302 15. Hussain MA, Mohamed AO, Abdelkarim OA, Yousef BA, Babikir AA, Mirghani MM, et al.  
303 Prevalence and Predictors of Antibiotic Self-Medication in Sudan: A Descriptive Cross-Sectional  
304 Study. *Antibiotics.* 2023;12(3):612.
- 305 16. Ocan M, Obuku EA, Bwanga F, Akena D, Richard S, Ogwal-Okeng J, et al. Household  
306 antimicrobial self-medication: a systematic review and meta-analysis of the burden, risk factors and  
307 outcomes in developing countries. *BMC public health.* 2015;15:742.
- 308 17. Green DL, Keenan K, Fredricks KJ, Huque SI, Mushi MF, Kansime C, et al. The role of  
309 multidimensional poverty in antibiotic misuse: a mixed-methods study of self-medication and non-  
310 adherence in Kenya, Tanzania, and Uganda. *The Lancet Global Health.* 2023;11(1):e59-e68.
- 311 18. Aslam A, Gajdacs M, Zin CS, Ab Rahman NS, Ahmed SI, Zafar MZ, et al. Evidence of the  
312 practice of self-medication with antibiotics among the lay public in low-and middle-income  
313 countries: a scoping review. *Antibiotics.* 2020;9(9):597.

- 314 19. Roien R, Bhandari D, Hosseini SMR, Mosawi SH, Ataie MA, Ozaki A, et al. Prevalence and  
315 determinants of self-medication with antibiotics among general population in Afghanistan. *Expert*  
316 *Review of Anti-infective Therapy*. 2022;20(2):315-21.
- 317 20. Aslam A, Zin CS, Jamshed S, Rahman NSA, Ahmed SI, Pallós P, et al. Self-Medication with  
318 Antibiotics: Prevalence, Practices and Related Factors among the Pakistani Public. *Antibiotics (Basel,*  
319 *Switzerland)*. 2022;11(6).
- 320 21. Chinemerem Nwobodo D, Ugwu MC, Oliseloke Anie C, Al-Ouqaili MT, Chinedu Ikem J, Victor  
321 Chigozie U, et al. Antibiotic resistance: The challenges and some emerging strategies for tackling a  
322 global menace. *Journal of Clinical Laboratory Analysis*. 2022;36(9):e24655.
- 323 22. Nankya S, Musinguzi P, Arishaba A, Najjuma<sup>1</sup> JN. Prevalence and Practices of Self-medication  
324 With Antibiotics Among Nursing Students at a Training Institution in Western Uganda. 2023.
- 325 23. Ocan M, Bwanga F, Bbosa GS, Bagenda D, Waako P, Ogwal-Okeng J, et al. Patterns and  
326 predictors of self-medication in northern Uganda. *PloS one*. 2014;9(3):e92323.
- 327 24. Lu C, Tian Y, Tian H, Li B, Peng B, Zheng J, et al. An ultrasound activable metal-phenolic  
328 network nano-antibiotics for in vivo on-site infection therapy. *Science China Materials*.  
329 2023;66(1):395-406.
- 330 25. Rabaan AA, Alhumaid S, Mutair AA, Garout M, Abulhamayel Y, Halwani MA, et al.  
331 Application of Artificial Intelligence in Combating High Antimicrobial Resistance Rates. *Antibiotics*.  
332 2022;11(6):784.
- 333 26. Nabaweesi I, Olum R, Sekite AB, Suubi WT, Nakiwunga P, Machali A, et al. Antibiotic  
334 practices, perceptions and self-medication among patients at a National Referral Hospital in Uganda.  
335 *Infection and drug resistance*. 2021:2155-64.
- 336 27. Naylor NR, Atun R, Zhu N, Kulasabanathan K, Silva S, Chatterjee A, et al. Estimating the  
337 burden of antimicrobial resistance: a systematic literature review. *Antimicrobial Resistance &*  
338 *Infection Control*. 2018;7(1):58.
- 339 28. WHO. *Antimicrobial Resistance*. 2021.
- 340 29. EClinicalMedicine. *Antimicrobial resistance: a top ten global public health threat*. 41.  
341 2021;101221.
- 342 30. Sachdev C, Anjankar A, Agrawal J. Self-medication with antibiotics: an element increasing  
343 resistance. *Cureus*. 2022;14(10).
- 344 31. Atif M, Asghar S, Mushtaq I, Malik I, Amin A, Babar Z-U-D, et al. What drives inappropriate  
345 use of antibiotics? A mixed methods study from Bahawalpur, Pakistan. *Infection and drug resistance*.  
346 2019:687-99.
- 347 32. Dache A, Dona A, Ejeso A. Inappropriate use of antibiotics, its reasons and contributing  
348 factors among communities of Yirgalem town, Sidama regional state, Ethiopia: A cross-sectional  
349 study. *SAGE Open Medicine*. 2021;9:20503121211042461.
- 350 33. Torres N, Chibi B, Middleton L, Solomon V, Mashamba-Thompson T. Evidence of factors  
351 influencing self-medication with antibiotics in low and middle-income countries: a systematic  
352 scoping review. *Public health*. 2019;168:92-101.
- 353 34. Elong Ekambi G-A, Okalla Ebongue C, Penda IC, Nnanga Nga E, Mpondo Mpondo E,  
354 Eboumbou Moukoko CE. Knowledge, practices and attitudes on antibiotics use in Cameroon: Self-  
355 medication and prescription survey among children, adolescents and adults in private pharmacies.  
356 *PloS one*. 2019;14(2):e0212875.
- 357 35. Mortazhejri S, Hong PJ, Yu AM, Hong BY, Stacey D, Bhatia RS, et al. Systematic review of  
358 patient-oriented interventions to reduce unnecessary use of antibiotics for upper respiratory tract  
359 infections. *Systematic reviews*. 2020;9:1-16.

360

361

362

363

364

365

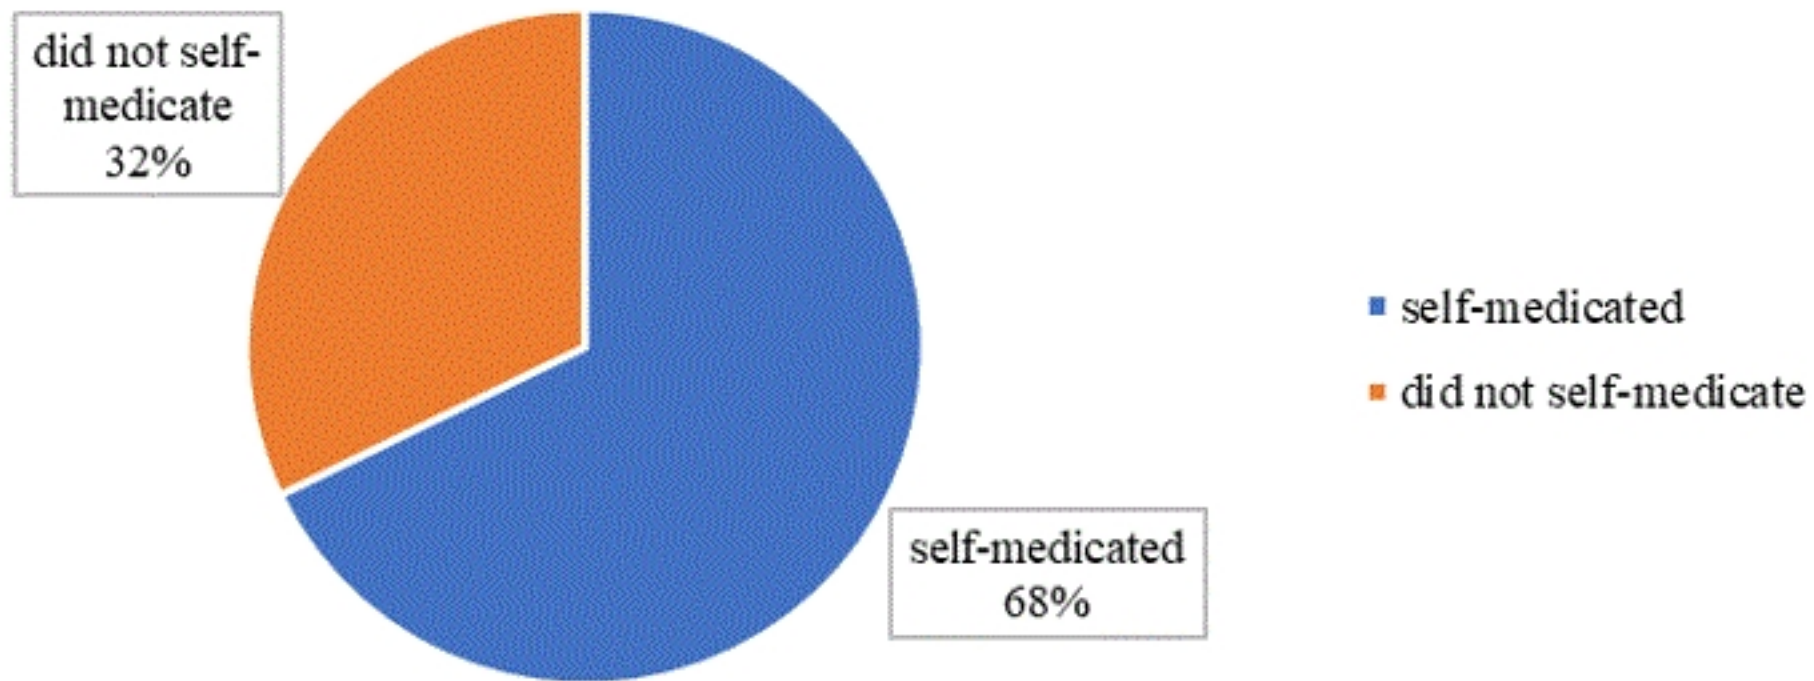

Figure
